# Supplementary material for: Role of the Health Belief Model in the Management of Hypertension: A Systematic Review
Source: Research Square preprint supplement (doi:10.21203/rs.3.rs-7061263/v1), 2025-08-18
Supplement: Supplementary file 1 [file 1b0120479835e6e12eb49c5a.xlsx]

## Sheet: Sheet1
Article Number	Author(s) and Year	Article title	Remarks	Cause of Inclusion (HBM)	Journal Name	Study Design Category	Methods/Study design	No. of constructs	Missing construct	Study Period	City/ Province/ State/ Country	Sample size	Study population	Population Age-group	Main objectives	Key findings	Intervention	Duration of Intervention	Association between HBM with BP reduction	Method of BP measurement	Effect of Intervention on BP	Effect of Intervention on medication adherence	Effect of Intervention on Self-management	Mean BP finding/ p Value/ OR / RR	Control Group	Specific Outcome	Mean age
52	Saffari et al., 2023	An Intervention Program Using the Health Belief Model to Modify Lifestyle in Coronary Heart Disease: Randomized Controlled Trial	Included	Information was collected using an HBM-specific questionnaire and the Health Promoting Lifestyle II (HPLP-II) scale.	International journal of behavioral medicine	Interventional Study	randomized controlled trial	6		April to August 2018 for data collection	general hospital in Orumiyeh, Iran	120 people with CHD	a diagnosis of CHD by a cardiologist based on WHO guidelines with cardiac function at grades 1 to 3; having a medical record for the past 6 months or longer at the hospital; ability to speak and write Persian; and ages 40 to 65 years old.	ages 40 to 65 years old	To examine how such modification based on the Health Belief Model (HBM) might improve lifestyle and clinical outcomes.	A significant difference was found between groups for health responsibility and systolic blood pressure at follow-up (p<0.05). All subscales of HPLP-II and clinical measures (FBS, systolic and diastolic BP, BMI) also improved significantly from baseline to follow-up in the intervention group (p<0.001), whereas measures of systolic BP unfavorably changed in the control group from baseline to follo…	HBM-based education program over 6 weeks	6 weeks	The study was conducted to determine whether an intervention based on the Health Belief Model might help patients with CHD adopt a healthy lifestyle and change behaviors that might influence clinical outcomes such as blood pressure. Among the clinical measures, the diastolic BP improved the least in the between-group comparisons.	Device: Riester diplomat-1002 arm mercury sphygmomanometer, Measurement: Average of 3-morning readings 3 consecutive days, sitting position after at least 10 min rest	Before intervention, Mean ± SD of Intervention group: SBP : 145.70 ± 10.80 mmHg DBP : 88.80 ± 7.30 mmHg & Control group: SBP : 144.20 ± 9.90 mmHg DBP : 88.00 ± 7.40 mmHg After intervention, Mean ± SD of Intervention group: SBP : 139.40 ± 8.40 mmHg DBP : 85.90 ± 6.40 mmHg & Control group: SBP : 145.20 ± 10.00 mmHg DBP : 87.70 ± 7.0 mmHg ANCOVA test (p value) SBP : 97.3 (< 0.001) DBP : 22.4 (< 0.00…			A significant difference was found between groups for health responsibility and systolic blood pressure at follow-up (p<0.05). ANCOVA demonstrated significant between-group differences from baseline to follow-up (p<0.001) with some-what less improvement for diastolic BP [F(1, 112)=22.36, p<0.001]	the control group received no additional intervention except for routine usual care	BP Reduction	The mean age of the participants was 52.4 (SD=7.7) years
8	Noroozi et al., 2022	Salt Consumption and Blood Pressure in Rural Hypertensive Participants: A Community Filed Trial.	Included	Intervention included a two-day workshop on blood pressure and reducing salt consumption based on HBM structures for health personnel.	The Scientific World Journal	Interventional Study	Randomized controlled field trial	5	Cues to action	2017	Sarvestan,a rural area in Fars province, Iran	200 hypertensive patients	hypertension (systolicblood pressure≥140 mmHg; diastolic blood pressure≥90mmHg), no neurological or learning disorders,≥1 year sincediagnosis, and signing an informed letter of consent	aging over 30 years	to evaluate an intervention based on the Health Belief Model regarding the whole family’s salt consumption and blood pressure among hypertensive patients in rural are as in Iran	Compared to the control group, in the intervention group, a significant reduction was observed in salt consumption by the families (urine sodium and creatinine reduced by 35mEq/l and 7.5mg/dL,respectively).The results also revealed a significant decrease in blood pressure in the intervention group.	(HBM) Intervention included a two-day workshop on blood pressure and reducing salt consumption based on HBM structures for health personnel who then delivered an 8 sessions (one session per week) workshop on how to reduce salt intake and blood pressure for mothers who were responsible for the families’ diets.	8 week)		Device: Mercury sphygmomanometer (ALP K2 Brand of V300) Measurement: Average of 2 morning reading 10 min apart, Sitting position, right arm.	Before intervention, Mean ± SD of Intervention group: SBP : 136.15 ± 13.74 mmHg DBP : 81.46 ± 8.95 mmHg & Control group: SBP : 136.16 ± 16.78 mmHg DBP : 81.20 ± 10.06 mmHg After intervention, Mean ± SD of Intervention group: SBP : 133.86 ± 14.84 mmHg DBP : 80.60 ± 8.29 mmHg & Control group: SBP : 136.10 ± 16.64 mmHg DBP : 81.25 ± 10.05 mmHg Mean difference in intervention group: SBP : 2.29 mmHg, …			Accordingly, the intervention had asignificant effect on the reduction of systolic and diastolicblood pressure (means of reduction�2.29 and 1.04mmHg,respectively	in the control group, routine educations were provided by health workers, parenting styles education was provided to mothers.	BP Reduction	60.92±12.05 year
10	Wang et al., 2020	Effects of a Comprehensive Reminder System Based on the Health Belief Model for Patients Who Have Had a Stroke on Health Behaviors, Blood Pressure, Disability, and Recurrence From Baseline to 6 Months: A Randomized Controlled Trial	Included	A multicenter, assessor-blinded, parallel-group, quantitative, randomized controlled trial was conducted to test the effects of the CRS-HBM program	The Journal of cardiovascular nursing	Interventional Study	randomized controlled trial	6 items but Including health related motivation	6 items but Including health related motivation	February 2015 to March2016	Guangzhou, China	174 patients	1) history of hypertension, (2) hospitalization within 1 month from new ischemic stroke onset, (3) ability to walk independently before stroke, (4) score of modified Rankin Scale (mRS) ranging from 0 to 3 at discharge,and (5) possession of a personal mobile phone and the ability to access the phone and short message service functions.	35 - 86 years	to determine the impact of a comprehensive reminder system intervention on health behaviors, medication adherence, blood pressure, disability, and stroke recurrence in patients with hypertension who have had a stroke from baseline to 6 months after discharge	Repeated-measures analysis of variance and single-effect analysis revealed that, compared with the control group, improvements of health behaviors, medication adherence, blood pressure, and disability of participants in the intervention group were superior. From 3 to 6 months after discharge, these trends remained or continually improved, whereas a downward trend was observed in the control group…	The intervention consisted of health belief education, a calendar handbook, weekly short message services, and telephone interviews.	6 months		Device: Standardized and calibrated automated electronic sphygmomanometer (name not mentioned) Measurement: Average of 2 readings, sitting position, after 5 min rest	Before intervention, Mean ± SD of Intervention group: SBP : 142.91 ± 14.05 mmHg DBP : 80.33 ± 9.12 mmHg & Control group: SBP : 138.65 ± 18.36 mmHg DBP : 83.32 ± 13.86 mmHg After intervention, Mean ± SD of Intervention group: SBP : 132.14 ± 10.67 mmHg DBP : 79.57 ± 7.41 mmHg & Control group: SBP : 137.37 ± 13.73 mmHg DBP : 83.07 ± 9.70 mmHg SBP (p value < 0.05) DBP (p value=0.927)	Analyses of Variance Between Groups in Change Scores from Baseline to 3- and 6-Month Follow-up Intervention group: Baseline: 2.96±0.99 3 months: 3.88±0.24 6 months: 3.87±0.39 Control group: Baseline: 3.26±0.86 3 months: 3.52±0.67 6 months: 3.34±0.81 For the medication adherence dimension of health behaviors, the time effect, the intervention effect, and the interaction effect of time and group we…	Total score of health behavior: Intervention group: Baseline: 2.53±0.52 3 months: 3.16±0.31 6 months: 3.23±0.35 Control group: Baseline: 2.50±0.42 3 months: 2.80±0.38 6 months: 2.75±0.40 A repeated measures analysis of variance showed that the time effect, the intervention effect, and the interaction effect of time and group were all statistically significant (P<0.001)	Regarding SBP, only the intervention effect had statistical significance (P<.05), Mean SBP 132.14±10.67 mmHg Mean DBP 83.07±9.70 mmHg	usual care in-cluding health education during hospitalization, a strokeprevention handout, telephone follow-up by nurses at1 week and 1 month, and follow-up by doctors at theoutpatient department after discharge.	BP Reduction
11	Zhang et al., 2020	Factors influencing health behaviour, blood pressure control, and disability in hypertensive ischaemic stroke patients after a comprehensive reminder intervention.	Included	Comprehensive Reminder System was based on the Health Belief Model	Journal of advanced nursing	Longitudinal Study	A nested cohort study design (randomized controlled trial )	6 items but Including health related motivation	10 and 11 ( Same research, different study)	February 2015 - March 2016	five neurology departments in three major general hospitals of Guangzhou, China	174	(a) history of hypertension, either in the patient's medical history or on admission to the hospital by physicians; (b) hospitalization within 1month from ischaemic stroke onset; (c) ability to walk independently prior to stroke diagnosis; (d) modified Rankin Scale (mRS) score between 0–3 at discharge with patients' return to their homes; and (e) possession of a personal mobile phone.	35-86 years	To test prospective pathways of a Comprehensive Reminder System based on the Health Belief Model (CRS-HBM), stroke knowledge, health belief in health be-haviour, blood pressure (BP) control, and disability in hypertensive ischaemic stroke patients at 6-month postdischarge	This model accounted for 51.5% of the variance in health behaviour, 34.1% in BP control, and 5.7% in modified Rankin Scale score at 6-month postdischarge. The CRS-HBM had: (a) direct positive effect (β=.391, p<.001) and indirect positive effects (β=.186, p=.002) on health behaviour; (b) direct positive effect (β = .356, p < .001) and indirect positive effects (β = .183, p = .009) on BP control; a…	(HBM) The intervention consisted of health belief education, a calendar handbook based on HBM, weekly short message services, and telephone interviews. (In the first 3months, intervention grouppatients received predischarge health belief education,weekly short message service reminders, 3 telephone in-terviews, and the Health Belief Model calendar hand-book intervention. After 3 months, patients …	6 months		Device: standardized and calibrated electronics sphygmomanometers (name not mentioned) Measurement: Not mentioned	Before intervention, Mean ± SD of Intervention group: BP control: 41 ± 53.95 mmHg & Control group: BP control: 38 ± 50.67 mmHg (p value = 0.163) After intervention, Mean ± SD of Intervention group: BP control: 64 ± 84.2 mmHg & Control group: BP control: 37 ± 49.33 mmHg (p value < .001) On BP control Direct positive effect (β = .356, p < .001) Indirect positive effects (β = .183, p = .009)		HPLP Ⅱ Total score Intervention group: Baseline: 2.55 ± 0.51 6 months: 3.23±0.35 Control group: Baseline: 2.54 ± 0.44 6 months: 2.75 ± 0.40 6 months after discharge, both groups showed improvement in health behaviours & when groups were compared in their total HPLP Ⅱ score, the intervention group showed statistically significant improvement than the control group. Direct positive effect (β = .391…	Significant positive effect on BP Control (<0.001)		BP Reduction
17	Saffari et al., 2020	Educational Intervention Based on the Health Belief Model to Modify Risk Factors of Cardiovascular Disease in Police Officers in Iran: A Quasi-experimental Study.	Included	educational program was based on the health belief model (HBM)	Journal of preventive medicine and public health	Interventional Study	Quasi-experimental Study	6		April and August 2018 for data collection.	Tehran, Iran	58 police officers	25-55 years old, having at least 2 years of employment as a police officer, having at least 3 of the following CVD risk factors: BMI ≥25 kg/m2, triglyceride (TG) level ≥200 mg/dL; total cholesterol ≥200 mg/dL; high-density lipoprotein cholesterol (HDL-C) <60 mg/dL; low-density lipoprotein cholesterol (LDL-C) >130 mg/dL; fasting blood sugar (FBS) ≥101 mg/dL; systolic blood pressure (SBP) ≥121 mmHg…	25-55 years old	This study evaluated how an educational program based on the health belief model (HBM) may protect police officers from developing CVD.	All aspects of the HBM scale improved between baseline and follow-up (p<0.05), except the cues to action subscale. Self-efficacy and preventive behaviors improved the most. BMI decreased from 26.7±2.9 kg/m2 at baseline to 25.8±2.4 kg/m2 at follow-up. All components of the lipid profile, including triglycerides, cholesterol, high-density lipoprotein, and low-density lipoprotein, showed significant…	(HBM)The intervention consisted of 5 HBM-based educational sessions. Follow-up was conducted at 3 months post-intervention.	5 week	All aspects of the HBM scale improved between baseline and follow-up (p<0.05), except the cues to action subscale. Self-efficacy and preventive behaviors improved the most. Blood pressure also decreased, but not significantly.	Device: Mercury sphygmomanometer (ALPK2-300V; Japan). Measurement: BP measurement for 3 consecutive days, sitting position	Before intervention, Mean ± SD: SBP : 132.3±26.8 mmHg & DBP : 85.1±19.7 mmHg (p value = 0.163) After intervention, Mean ± SD of Intervention group: SBP : 126.2±24.9 mmHg & Control group: DBP : 83.5±18.8 mmHg SBP (p value = 0.063) DBP (p value = 0.235) Not significant			Changes in the blood pressure (SBP and DBP) for CVD from baseline to follow-up : mean ± standard deviation of SBP (mmHg) at Baseline (n=58) was 132.3±26.81, at follow-up (n=57) was 26.2±24.90 and Comparison (p-value) was 0.063. Mean ± standard deviation of DBP (mmHg) at Baseline (n=58) was 85.1±19.7, at follow-up (n=57) was 83.5±18.8 and Comparison (p-value) was 0.235.		BP Reduction	he mean age of participants was 35.5±4.4 years
23	Wan et al., 2018	The Efficacy of a Comprehensive ReminderSystem to Improve Health Behaviors andBlood Pressure Control in HypertensiveIschemic Stroke PatientsA Randomized Controlled Trial	Included	Comprehensive Reminder System is based on Health Belief Model	Journal of Cardiovascular Nursing	Interventional Study	randomized, parallel-group, assessor-blinded experimental design	6, but cues to action seperate. health motivation included		February 2015 and March 2016,	Guangzhou, China	174 hospitalized hypertensive ischemic stroke patients	(1) a diagnosis of hypertension, either in the patient"s medical history on admission to the hospital, defined as 140 mm Hg or higher for systolic blood pressure (SBP) and/or 90 mmHg or higher for diastolic blood pressure by physicians2; (2) hospitalization within 1 month from ischemic stroke onset; (3) ability to walk independently before stroke diagnosis; (4) modified Rankin scale score of less…	35-86 years ( result part)	we tested the effect of a Health Belief Model Comprehensive Reminder System on health behaviors and blood pressure control in hypertensive ischemic stroke patients after occurrence and hospital discharge	Three months after discharge, the intervention group showed statistically, significantly better health behaviors for physical activity, nutrition, low-salt diet, and medication adherence. The intervention group also had statistically, significantly decreased systolic blood pressure and increased blood pressure control rate. Smoking and alcohol use behaviors were not affected	In addition to the usual stroke education, the intervention group received the CRS-HBM Program. Grounded in the HBM,the CRS-HBM program is a continuous, dynamic, discharge-to-post hospitalization transitional care program that includes multiple reminding methods with the intention of improving patients"health behavior.	3 months	The intervention group had statistically & significantly decreased systolic blood pressure and increased blood pressure control rate.	Device: Standardized and calibrated electronics sphygmomanometers (name not mentioned) Measurement: Each reported value is the mean of 2 measures acquired in the sitting position after 5 min rest	Before intervention, Mean ± SD of Intervention group: SBP : 143.21 ± 13.96 mmHg DBP : 80.53 ± 9.02 mmHg & Control group: SBP : 138.96 ± 18.37 mmHg DBP : 79.40 ± 11.00 mmHg After intervention, Mean ± SD of Intervention group: SBP : 133.35 ± 8.70 mmHg DBP : 79.94 ± 7.06 mmHg & Control group: SBP : 137.58 ± 14.61 mmHg DBP : 82.50 ± 10.22 mmHg Mean difference in intervention group: SBP : -9.86 mmHg, …		Total score of health behavior over time and between groups: Intervention group: Baseline: 2.54 ± 0.52 3 months: 3.16 ± 0.32 Changes: 0.61±0.41* Control group: Baseline: 2.51 ± 0.42 3 months: 2.79 ± 0.38 Changes: 0.28 ± 0.42* Three months post-discharge, both groups showed improved health behaviors, yet when the groups were compared in their total HPLP II score, the difference was statistically s…	Intervention group shows improved SBP over time (P<0.001). The intervention group also lowers their diastolic blood pressure. Comparison of Health Behaviors Over Time and Between Groups: mean ± standard deviation of BP at Baseline was in Control group (n = 78) 3.24 (1.22), in Intervention group (n=80) 3.20 (1.27) and p Value was .9783. After 3 months, mean ± standard deviation of BP in Control gr…	All subjects in the study received care as usual including health education during hospitalization, a stroke prevention handout, follow-up by doctors at the outpatient department, and telephone follow-up by nurses at 1 week and 1 month after discharge	BP Reduction
36	Kamal et al., 2015	A randomized controlled behavioral intervention trial to improve medication adherence in adult stroke patients with prescription tailored Short Messaging Service (SMS)-SMS4 Stroke study.	Included	The Health Belief Model and Social Cognitive theory were used to design the language and content of messages	BMC neurology	Interventional Study	randomized controlled trial	6		Enrollment began on 5th December 2013 and the last patient was recruited on 30th April 2014. The last follow-up was conducted on 28th June 2014.	Pakistan	162	Age greater than 18 years old, History of stroke(s) confirmed by neuroimaging at the time of the episode, >1 month since last episode of stroke, Use of at least two drugs such as (but not limited to) anti platelets, statins, anti-hypertensives to control risk factors of stroke. Modified Rankin Score of 3 or less (so that they are able to operate mobile phones) Possession of a personal cell phone …	Age greater than 18 years old	to test the effectiveness of SMS on improving medication adherence in stroke survivors in Pakistan	The mean medication score was 7.4 (95 % CI: 7.2–7.6) in the intervention group while 6.7 (95 % CI: 6.4–7.02) in the control group. The adjusted mean difference (Δ) was 0.54 (95 % CI: 0.22–0.85). The mean diastolic blood pressure in the intervention group was 2.6 mmHg (95 % CI;−5.5 to 0.15) lower compared to the usual care group.	(HBM+Social Cognitive theory) The intervention group, in addition to usual care, received reminder SMS for 2 months that contained a) Personalized, prescription tailored dailymedication reminder(s) b) Twice weekly health information SMS.	8 weeks	A smallbut significant difference in diastolic blood pressure was observed in those who received SMS (The study used the Health Belief Model, as opposed to simple knowledge transfer, which predicts influences on human behavior ia messages thattouched on these themes.)	Device: Mindray Datascope Equator Measurement: BP measured on participant sitting and relaxed.	Before intervention, Mean of Intervention group: DBP : 80 mmHg Control group: DBP : 80.6 mmHg After intervention, Mean SD of Intervention group: DBP : 77.9 mmHg & Control group: DBP : 80.5 mmHg Mean difference Intervention group: DBP : -2.6 mmHg. Control group: DBP : -0.1 mmHg SBP ( p value=0.678) DBP ( p value=0.06) Not significant	Morisky medication adherence score Intervention group: Baseline: 6.6 ± 0.17 2 months: 7.4 ± 0.93 Control group: Baseline: 6.6 ± 0.16 2 months: 6.7 ± 1.32 Adjusted differencea (95%CI) 0.54(0.22–0.85) This difference was found to be statistically significant (p<0.01)		The mean diastolic blood pressure in the intervention group was 2.6 mmHg (95 % CI;−5.5 to 0.15) lower compared to the usual care group. Mean DBP Preintervention was 80 mmHg in Intervention group and 80.6 mmHg in Usual care group. Mean DBP Post-intervention 77.9 mmHg in Intervention group and 80.5 mmHg in Usual care group. Mean difference -2.6 in Intervention group and -0.1 in Usual care group. 95…	usual standard of care provided at the center for stroke patients.	BP Reduction	The mean age in the intervention group was lower (56 years. S.D 1.5 years) compared to (57.6 years, S.D 1.3 years) in the usual care group.
39	Suhat et al., 2022	Relationship of Health Belief Model with Medication Adherence and Risk Factor Prevention in Hypertension Patients in Cimahi City, Indonesia	Included	relationship of the health belief model with medical adherence and risk factors prevention in HTN patient	Evidence Based Care Journal	cross-sectional study	cross-sectional study	4	cues to action, self efficacy	2019	health centers in Cimahi City, Indonesi	180 patients	age range of above 18 years, receiving antihypertensive medication from the public health center, and willingness to take part in this research.	age range of above 18 years,	to determine the relationship of the health belief model with medical adherence and risk factor prevention in hypertension patients	The majority of participants were female (88.9%), unemployed (76.7%), within the age range of 40-59 years (60.0%), and had low education (75.0%). Moreover, most cases had health insurance (91.7%), with a maximum duration of hypertension less than 5 years (70.6%), and a body mass index (BMI) between 18.5-25.0 (45%). The health belief model was related to adherence to hypertension treatment (P<0.05…										The health belief model was related to adherence to hypertension treatment (P<0.05)
43	Larki et al., 2021	Factors predicting self-care behaviors among low health literacy hypertensive patients based on health belief model in Bushehr district, south of Iran	Included	Health beliefs model questionnaire were completed.	Social Medicine	A cross-sectional study	A cross-sectional study	5	cues to action		Bushehr district, south of Iran	152 hypertensive patients	152 hypertensive patients	over 30 years	to determine the factors influencing adherence to self-care behaviors among low health literacy hyperten-sive patients based on health belief model.	Perceived self-efficacy was associated with all self-care behaviors except medication regimens. There was a significant association between perceived susceptibility and adherence to both low-salt diet (OR = 3.47) and nonsmoking behavior (OR = 1.10). Individuals who had more perceived severity (OR = 1.82) had significantly greater adherence to their medication regimens. Perceived benefits and barr…										only 9.2% had a proper adherence to their medication regimen, Individuals who had more perceived severity (OR=1.301) had significantly greater adherence to their medication regimens compared to those who had less perceived severity.
47	Yazdanpanah et al., 2019	Effect of an Educational Program based on Health Belief Model on Medication Adherence in Elderly Patients with Hypertension	Included	Educational Intervention was based on Health Belief Model	Evidence Based Care Journal	Two-group Randomized controlled clinical trial	Two-group Randomized controlled clinical trial	6		during 2017	health centers in Mashhad, Iran	60 elderly patients with hypertension	1) the age of 60 years or over, 2) reading and writing literacy, 3) history of visits by the elderly at least in the past 6 months, 4) history of hypertension based on self-reports and history of health records, 5) history of at least 6 months of hypertension medication use on a daily basis, and 6) lack of psychological-cognitive disorders approved by a psychiatrist.	60-year-old	to determine the effect of an educational program based on the Health Belief Model (HBM) on medication adherence in older adults suffering from hypertension	The post-test mean score of medication adherence obtained by the intervention group was 6.7±0.5 that was significantly higher than that of the control group (3.7±1.0) (P˂0.001). Moreover, the mean score of medication adherence in the intervention group had significantly increased in the post-test phase (P˂0.001) based on the within-group results of the paired t-test.	The intervention included 8 educational sessions for the intervention group based on the steps of the HBM. Each session was held in Danesh Amooz and Sadaf Health Centers near the elderly people’s place of residence for one hour twice a week. The center was equipped with computer systems and projectors,	8 educational sessions One hour twice a week			The post-test mean score of medication adherence Intervention group: 6.7±0.5 Control group 3.7±1.0 Mean score of medication adherence in the intervention group had significantly increased in the post-test phase (P˂0.001) based on the within-group results of the paired t-test.						The mean ages of the participants in the intervention and control groups were 69.1±8.3 and 63.9±6.7 years
76	Obirikorang et al., 2018	Predictors of Noncompliance to Antihypertensive Therapy among Hypertensive Patients Ghana: Application of Health Belief Model.	Included	The questionnaire constituted information regarding sociodemographics, a five-Likert type HBM questionnaire, and lifestyle-related factors	International Journal of Hypertension	cross-sectional descriptive study	cross-sectional descriptive study	5	self efficacy		Kintampo Municipality , Ghana	678 hypertensive patients.	hypertensive patients who were on antihy-pertensive therapy and attending the Hypertension Clinic.	31 - 60 years	To determine noncompliance to antihypertensive therapy (AHT) and its associated factors in a Ghanaian populationby using the health belief model (HBM).	Five HBM constructs explained 31.7% of the variance in noncompliance to AHT with a prediction accuracy of 77.5%, after adjusting for age, gender, and duration of condition. Higher levels of perceived benefits of using medicine [aOR=0.55(0.36-0.82), p=0.0001] and cue to actions [aOR=0.59 (0.38-0.90),p=0.0008] were significantly associated with reduced noncompliance while perceived susceptibility […											mean age (SD) of the participants was 43.5 (±5.2) years
24	Yang et al., 2016	Determinants of antihypertensive adherence among patients in Beijing: Application of the health belief model.	Included	questionnaire was based on HBM	Patient education and counseling	A cross-sectional study	A cross-sectional study	5	perception of susceptibility		Shunyi District, Beijing, China	745 hypertensive patients	diagnosed with essential hypertension reported taking at least one kind of antihypertensive medication at the time of study	18 - 80 years ( result part)	to determine the factors associated with antihypertensive adherence based on the Health Belief Model (HBM)	The prevalence of adherence was 43.5%. Structural equation modeling showed that men, older participants, and those with greater knowledge of hypertension showed better medication adherence than did other participants. Based on the HBM, higher levels of self-efficacy and perceived severity and a lower level of perceived barriers were associated with better antihypertensive adherence. Self-efficacy…										Among all participants, 43.5% were regarded as having good adherence (i.e.,a score of 4 on the MMAS-4); all other participants had a score below 4, which was considered to indicate poor adherence. Good adherence was significantly more common among older participants, those with health insurance, and those with a higher level of hypertension knowledge. Men (P=0.012), older participants (P<0.001), …	Patients’ mean age was 56.4 ± 10.8 years.
45	Mahrous et al., 2015	Factors affecting compliance of hypertensive patients toward therapeutic regimen	Included	Health Belief Model variables were used to to assess factors affecting treatment compliance with antihypertensive therapy	Life Science Journal	Cross sectional design, not Quasi, should we include?	Cross sectional design, not Quasi, should we include?	5	self efficacy	2014	Ain Shams University Hospital	135 hypertensive patients	1) Patients of age 18 years and above, 2) Participants with a diagnosis of hypertension for at least one month with or without other co-existing medical conditions. 3) Participants who have been taking antihypertensive treatment for at least past one month ago.	age 18 years and above	to assess factors affecting treatment compliance with antihypertensive therapy guided by the use of Health Belief Model variables among hypertensive patients.	Hypertensive patients showed low compliance to antihypertensive treatment, the most significant factors with demographic characteristic was sex (female being compliant) and with the guide of Health Belief Model (HBM) the strongest predictor was perceived barrier to antihypertensive treatment, and there was statistically significant relation between over all patients compliance & their information…										the proportional of treatment compliance was 53.3%, participants who were 64 and below years of age had higher level of treatment compliance, patients without formal education level (55.6%), female were more compliant (63.2%)
37	Venkatachalam et al., 2015	Determinants of patient′s adherence to hypertension medications in a rural population of Kancheepuram District in Tamil Nadu, South India	Included	Association between hypertension medication adherence and Health Belief model . The study domains included were patient’s adherence, sociodemographic factors, subjective health status, lifestyle factors, medication-related variables, perceived susceptibility, severity, benefit, barriers, cue to action, and self-efficacy using the health belief model.	Indian Journal of Community Medicine	Community-based cross-sectional study	Community-based cross-sectional study	6			Kancheepuram district, Tamil Nadu,	473 hypertensive patients	a) known case of HT residing in the study area for at least 6 months duration; b) duration of the diagnosed disease for more than one year; c) not suffering from any acute conditions such as myocardial infarction (MI), stroke, acute renal failure (ARF)	All adults in the age group of 20 years or more	To study the factors determining adherence to HT medication.	473 hypertensive patients of which 226 were males and 247 were females. The prevalence of adherence was 24.1% (n=114) in the study population. Respondents with regular physical activity, non-smokers and non-alcoholics were more adherent to HT medication as compared with respondents with sedentary lifestyle, smoking and alcohol intake (P < 0.005). Based on health belief model, the respondents who …
18	Yue et al., 2015	Application of the health belief model to improve the understanding of antihypertensive medication adherence among Chinese patients.	Included	health belief model used as a theoretical framework.( Questionnaire)	Patient education and counseling	cross-sectional study	cross-sectional study	6			Shanghai,China.	232 patients	(1) primary hypertension (HTN); (2) under antihypertensive drug treatment; (3) under drug treatment for a least one month;		to gain in sight into antihypertensive medication adherence on the basis of a well-developed behavior theory	The HBM explained 48.8% of the variance in antihypertensive medication adherence with an over all prediction accuracy was 82.8%. After adjusting for controlling factors, the HBM explained 50.5% of the variance in antihypertensive medication adherence with an over all prediction accuracy of 86.2%. Higher levels of perceived susceptibility (p=0.017), cues to action (p=0.034), and self-efficacy (p=0…											The average age of the study participants was 64± 11.0 years old.
90	kamran A et al., 2014	Determinants of Patient’s Adherence to Hypertension Medications: Application of Health Belief Model Among Rural Patients	Included	HBM association with hypertensive drug adherence	Annals of Medical and Health Sciences Research	Cross-sectional Study	Cross-sectional	5	cue to action	May-June,2013	Ardabil city, Iran	671 hypertensive patients	671 hypertensive patients	30 and above	this study was aimed to determine the factors of adherence to hypertension medication based on HBM	A total of 671 hypertensive patients participated in the study (169 were males and 502 were females). The prevalence of adherence was 24% (161/671)% in the study population. Respondents with regular physical activity and nonsmokers were more adherent to hypertension medication when compared to respondents with sedentary lifestyle and smoking (P < 0.01). Based on HBM constructs, the respondents wh…										Drug Adherence
6	Afshari et al., 2022	Examining the Effect of the Training Program by Using the Health Belief Model in Performing Self-Care Behaviors of Rural Patients Having High Blood Pressure.	Included	The questionnaire including the Health Belief Model was administered	Community health equity research & policy	Interventional Study	quasi-experimental research	6		from April to August 2019	four healthhouses in rural areas of Toyserkan (West of Iran).	100 hypertensive patient	patients’ health records in the four health houses for controlling the diseases and treatments, having high blood pressure during the past three months, participating in the study voluntarily, and being able to attend its training sessions.		to determine the effect of educational program on self-care behaviors of rural patientsafflicted with hypertension in Toyserkan city	Perceived susceptibility, perceived severity, self-efficacy and self-care behavior constructs did not have significant statistical differences in terms of mean scores before intervention between the two groups, but after intervention, there were statistically significant differences between the two groups. Examining the model factor in predicting self-care in the intervention group showed that th…	(HBM) Three training session in 2 weeks, and each lasting one hour about the self-regulation of blood pressure based on the health belief model	2 weeks	Reviewing the most important factors of the health belief model in predicting the self-care of hypertension showed that the final model of perceived severity and self-efficacy constructs in the third stage had the highest predictive power. It suggested that whatever perceived severity and self-efficacy constructs was higher; there was more reported self-care	Device: Mercury Manometer (name not mentioned) Measurement: Author declared fulfilling necessary criteria for BP measurement without any details	Mean BP ± SD of the Intervention groups: 151.99 ± 1.98 mmHg Control groups: 152.94 ± 2.53mm Hg. No significant difference between the intervention vs. Control groups (P>0.05).		Mean Score of Self-care Behaviors: Intervention group: Before Intervention: 10.50 ± 2.25 After Intervention: 12.02 ± 2.50 p = 0.337 Control group: Before Intervention: 11.45 ± 2.03 After Intervention: 11.36 ± 1.96 p = 0.044 After training there was an increase in mean scores of self-care in the intervention group with a significant difference between the two groups (p<0.05).	Mean blood pressure and standard deviation of participants of the intervention vs. Control groups were 151.99 _x0002_ 1.98 mmHg and 152.94 _x0002_ 2.53 mm Hg. There was no significant difference between the intervention vs. Control groups in this variable (P > 0.05). The blood pressure mean and standard deviation of participants in the intervention vs. Control groups were131.89±2.1 mmHg and 132.9…	the control group did not take part in any training programs	BP Reduction	mean age and standard deviation of participants in the intervention vs. Control groups were 64.38±9.12 and 65.14±10.60
3	Sadeghi et al., 2022	Predictive Factors for the Care and Control of Hypertension Based on the Health Belief Model Among Hypertensive Patients During the COVID-19 Epidemic in Sirjan, Iran	Included		Current Hypertension Reviews	Cross-sectional Study	Cross-sectional	6		COVID-19 pandemic	Sirjan, Iran	200 hypertensive patients	30-60 years old hypertensive patients	30-60 years	To investigate the predictive factors for care and control of hypertension (CCH) according to the health belief model (HBM)	The results of Pearson correlation coefficients showed that there was a significant correlation among almost all constructs of the Health Belief Model (HBM), but the strongest correlations were between self-efficacy and perceived susceptibility (r = 0.940, P ≤ 0.001), and between perceived barriers with perceived benefits (r = -0.615, P ≤ 0.001). According to linear regression, perceived barriers…										Self-care behavior
42	Naeemi et al., 2022	The effect of educational intervention on self-care behavior in hypertensive older people: Applying the health belief model	Included	The study used the Health Belief Model (HBM) as a theoretical framework for the educational intervention	Journal of Education and Health Promotion	Interventional Study	A quasi‑experimental study	6		from 2019 to 2020.	Ardestan, Iran	99 hypertensive elderly people	participants included age(≥60years), place of residence(rural areas until the end of the study), and developing hypertension based on physician approval.	age(≥60years)	to investigate the effects of educational intervention on self‑care behaviors that influence hypertension control among the elderly population during 2020 based on the health belief model.	After three months of intervention, the variables of awareness, self‑care, and perceived sensitivity constructs, perceived severity, perceived benefits, and guide to action showed a significant rise in the experimental group compared to the control group. In addition, the effectiveness of educational intervention significantly increased self‑care behavior in the experimental group. The mean score…	(HBM)two educational intervention sessions	Once(not clearly mentioned)					Mean Score of Self-care score: Intervention group: Before Intervention: 60.02 ± 12.2 3 months after Intervention: 79.4 ± 7.2 Control group: Intervention group: Before Intervention: 59.1 ± 9.9 3 months after Intervention: 59.7 ± 10 Paired t-test showed that in the experimental group, the mean scores of self-care three months after the intervention were significantly higher than before the interven…			Self-care behavior
7	Zareban et al., 2022	High blood pressure self-care among hypertensive patients in Iran: a theory-driven study.	Included	Data were gathered using questionnaires assessing health belief model (HBM) constructs (perceived benefits to healthy behavior, barriers to healthy behavior, perceived disease threat, self-efficacy to engage in healthy behavior, and cues to action) to address blood pressure	Journal of human hypertension	Cross-sectional Study	cross-sectional analytic study	5	Severity of the condition	2018	Zarandieh-Iran	527 patients with hypertension	hypertension (systolicblood pressure≥140 mmHg; diastolic blood pressure≥90mmHg), no neurological or learning disorders,≥1 year since diagnosis	20 years and above	to assess blood pressure self-care among hypertensive patients in Iran	512 patients (215 men and 297 women) participated in this study. Participants who were married, and more educated engaged in more self-care behaviors. At least one-half of the patients (47.6%) demonstrated a moderate level of self-care behaviors with a mean score of self-care equal to 9.32 ± 3.6 (out of 18). All the elements of HBM and social support were significant predictors of self-care behav…										Self-care behavior	64.8 ± 11.
9	Ma, 2018	An investigation of factors influencing self-care behaviors in young and middle-aged adults with hypertension based on a health belief model.	Included	The measuring instruments included health belief questionnaire for hypertensive patients	Heart & lung : the journal of critical care	Cross-sectional Study	cross-sectional	5	Cues to action	from September 2015 to March 2016	two outpatient departments of cardiovascu-lar disease in two tertiary teaching hospitals, Yuexiu District,Guangzhou, southern China.	382 eligible participants	(1) aged between 18 and 59 years; (2)diagnosed with essential hypertension by a cardiovascular physi-cian; (3) no cognitive and mental disorders; and (4) agreed to jointhe study. Exclusion criteria were pregnant women and patients withsecondary hypertension.	aged between 18 and 59 years	To explore whether five variables of the health belief model were factors influencing self-care behaviors in young and middle-aged adults with hypertension	The predictors of self-care behaviors in young and middle-aged adults with hypertension included age, complications related to hypertension, perceived susceptibility, severity, benefits, barriers and self-efficacy. Five aspects of health beliefs model accounted for 47.0% of total variance. statistically significant, correlated relationship between self-care behaviors and health beliefs (r=0.51). …										Self-care behavior	48.37years (SD 9.63)
12	Khorsandi et al., 2017	Investigation of the effect of education based on the health belief model on the adoption of hypertension-controlling behaviors in the elderly.	Included	based on the HBM, an educational program and the related contents were planned.	Clinical interventions in aging	Interventional Study	an interventional and quasiexperimental study	6		NR	Qom, Iran	91 hypertensive elderly	age 60–65 years, hypertension, no communicative and speaking problems, and lack of cognitive disorders and dementia.	aged 60–65 years	to investigate the effect of education based on the health belief model (HBM) on the adoption of hypertension-controlling behaviors in the elderly	Repeated measure analysis of variance showed a significant difference in the scores of the constructs in the intervention and nonintervention groups before, immediately after, and 3 months after the intervention(P,0.001). The elderly people’s knowledge about hypertension-controlling behaviors was 59% of the total score, in other words, they had a medium level of knowledge in this regard. Increase…	(HBM) educational intervention for the test group included two educational sessions, including lecture, educational film, and group discussion, based on the Health Belief Model (HBM).	3 weeks					p values of changes in mean score after the intervention of different constructs: Susceptibility: 0.041 Awareness: 0.013 Benefit: 0.001 Barrier: 0.001 Practice: 0.001 Self-efficacy: 0.010 Action: 0.001		no intervention but educational pamphlets.	Self-care behavior	62.2 years
78	Barros et al., 2014	Health behaviors of people with hypertension: health belief model.	Included	Interview was based on HBM	Rev Rene	Cross-sectional Study	descriptive cross-sectional study	4	cues to action, self efficacy	Data collection from March to December, 2013	five health centers in Fortaleza, CE, Brazil,	133 patients	133 patients over 18 years old, with hypertension, registered in the Clinical Management System for Hypertension and Diabetes Mellitus in Primary Care, and monitored in chosen randomly and probabilistically.	Over 18 years old	To identify the lifestyle of hypertensive patients, focusing on their health behaviors in light of the Health Belief Model.	By analyzing the behaviors of patients in light of the Health Belief Model, one identified divergent discourses among patients when they responded to the questions related to the susceptibility and severity of the disease: 69.2% felt susceptible, fearing complications of the disease, 94.7% believed they lived well with the disease and 89.5% showed concern to their keep blood pressure under contro…										Self-care behavior	Age-group of adults and seniors, with 56.4 and 43.6%, respectively, with an average of 59.70 years old, standard deviation of 11.12 and a median of 58.5 years old.
91	Allah and Khalil, 2016	Effect of Health Education Intervention on Improving Compliance to Treatment among Hypertensive Patients: Application of Health Belief Model	Included	“The health belief model Group”: received educational intervention sessions based on the HBM conceptual framework,	The Egyptian Journal of Community Medicine	Interventional Study	Pre-post intervention study	6		Data was collected from the 2 groups before and 3 months after the intervention.	Hypertension clinic at Zagazig University Hospital - Sharkia governorate, Egypt	186	Patients of age 18 years and more, participants with a diagnosis of hypertension for at least one month with or without other existing medical conditions, participants who have been taking antihypertensive treatment for at least one month ago	Age 18 years and more	To determine level of participants’ knowledge about hypertension. Then to assess factors affecting treatment compliance with antihypertensive treatment guided by the use of Health Belief Model variables among hypertensive patients. Finally evaluate the effectiveness of using health education applying HBM on knowledge and compliance to treatment.	Marked improvement in the HBM group in overall compliance (61.3% to 79.6%) in contrast to the ordinary health education group no marked improvement. The percentages of Perceived susceptibility, Perceived severity, Perceived benefits, Perceived barriers, Self-efficacy cues to action show changes between pretest and post test results with a statistical difference in HBM group. For control group com…	Intervention group: HBM-based education program Control group: Traditional health education on hypertension and compliance to medication and lifestyle regimen.		Before intervention, Mean ± SD: SBP : 169.3±19.4 mmHg & DBP : 97.6±7.3 mmHg (p value <0.001) After intervention, Mean ± SD of Intervention group: SBP : 150.2±14.5 mmHg & Control group: DBP : 87.1±6.4 mmHg (p value <0.001) There was statistically significant difference between BP in the two groups before and after intervention (p value <0.001	Device: Sphygmomanometer (name not mentioned) Measurement: BP measurement in a sitting position after 5 min of rest and the mean of two measures taken 2 min apart was used	Before intervention, Mean ± SD: SBP : 169.3±19.4 mmHg & DBP : 97.6±7.3 mmHg (p value <0.001) After intervention, Mean ± SD of Intervention group: SBP : 150.2±14.5 mmHg & Control group: DBP : 87.1±6.4 mmHg (p value <0.001) There was statistically significant difference between BP in the two groups before and after intervention (p value <0.001)	Marked improvement in the HBM group in medication compliance (59.9% to 79.6%) and overall compliance (61.3% to 79.6%) A significant difference was present by comparing pre & post-test results in HBM group (p <0.05).		mean of systolic blood pressure among two group from (169.3 to 150.2) in HBM group and from (167.1to 155.5) in the other group, regarding diastolic blood pressure marked change occur between pre & post intervention in HBM (97.6 to 87.1) and moderate change in the group of ordinary HE (96.1 to 91.5)	received the traditional health education on hypertension for comparison group stressed on increasing knowledge about hypertension risk factors, clinical presentation, its severity, the value of early diagnosis. The used educational methods were lectures demonstrated by PowerPoint. The educational program was given in the form of person to person or small groups by direct personal communication d…	comparison of life style, medication compliance and overall compliance to treatment among two groups first the compliance to life style was increased after intervention in both group (55.9% to 65.5% in HBM group, 52.7% to 55.9% in comparison group). A significant difference was present by comparing pre & post test results in HBM group (p <0.05). Marked improvement in the HBM group in medication c…
