# Supplementary material for: Role of the Health Belief Model in the Management of Hypertension: A Systematic Review
Source: Research Square preprint supplement (doi:10.21203/rs.3.rs-7061263/v1), 2025-08-18
Supplement: Supplementary file 2 [file 3e2269b7ed0bd02ad2e51324.docx]

**JBI Assessment Tool**

| **Risk of bias for cross-sectional studies** | | | | | | | | | | |
| --- | --- | --- | --- | --- | --- | --- | --- | --- | --- | --- |
| **Author, Year** | **Q1. Were the criteria for inclusion in the sample clearly defined?** | **Q2. Were the study subjects and the setting described in detail?** | **Q3. Was the exposure measured in a valid and reliable way?** | **Q4. Were objective, standard criteria used for measurement of the condition?** | **Q5. Were confounding factors identified?** | **Q6. Were strategies to deal with confounding factors stated?** | **Q7. Were the outcomes measured in a valid and reliable way?** | **Q8. Was appropriate statistical analysis used?** | **Total Score** | **Quality Assessment**** |
| Suhat *et al.*, 2022 | Yes | Yes | Yes | Yes | No | No | Yes | Yes | 6 | Moderate |
| Sadeghi *et al.*, 2022 | Yes | Yes | Yes | Yes | No | No | Yes | Yes | 6 | Moderate |
| Zareban *et al.*, 2022 | Yes | Yes | Yes | Yes | No | No | Yes | Yes | 6 | Moderate |
| Larki, Reisi and Tahmasebi, 2021 | Yes | Yes | Yes | Yes | No | No | Yes | Yes | 6 | Moderate |
| Obirikorang *et al.*, 2018 | Yes | Yes | Yes | Yes | No | No | Yes | Yes | 6 | Moderate |
| Ma, 2018 | Yes | Yes | Yes | Yes | No | No | Yes | Yes | 6 | Moderate |
| Yang *et al.*, 2016 | Yes | Yes | Yes | Yes | No | No | Yes | Yes | 6 | Moderate |
| Mahrous, 2015 | Yes | Yes | Yes | Yes | No | No | Yes | Yes | 6 | Moderate |
| Venkatachalam *et al.*, 2015 | Yes | Yes | Yes | Yes | No | No | Yes | Yes | 6 | Moderate |
| Yue *et al.*, 2015 | Yes | Yes | Yes | Yes | Yes | Yes | Yes | Yes | 8 | Low |
| Kamran *et al.*, 2014 | Yes | Yes | Yes | Yes | No | No | Yes | Yes | 6 | Moderate |
| Alves Barros *et al.*, 2014 | Yes | Yes | Unclear | Yes | No | No | Yes | Yes | 5 | Moderate |

| **Risk of bias for cohort study** | | | | | | | | | | | | | | |
| --- | --- | --- | --- | --- | --- | --- | --- | --- | --- | --- | --- | --- | --- | --- |
| **Author, Year** | **Q1. Were the two groups similar and recruited from the same population?** | **Q2. Were the exposures measured similarly to assign people to both exposed and unexposed groups?** | **Q3. Was the exposure measured in a valid and reliable way?** | **Q4. Were confounding factors identified?** | **Q5. Were strategies to deal with confounding factors stated?** | **Q6. Were the groups/participants free of the outcome at the start of the study (or at the moment of exposure)?** | **Q7. Were the outcomes measured in a valid and reliable way?** | **Q8. Was the follow up time reported and sufficient to be long enough for outcomes to occur?** | **Q9. Was follow up complete, and if not, were the reasons to loss to follow up described and explored?** | **Q10. Were strategies to address incomplete follow up utilized?** | **Q11. Was appropriate statistical analysis used?** | **Total Score** | **Quality Assessment**** |
| Zhang *et al.*, 2020 | Yes | Yes | Yes | Yes | Yes | Yes | Yes | Yes | Unclear | Unclear | Yes | 9 | Low |

**JBI Assessment Tool**

**Assessor’s Name: Mohammad Tanvir Islam Date: 10.04.2025**

| **Risk of bias for Quasi-experimental studies and Pre-Post Intervention study** | | | | | | | | | | | | |
| --- | --- | --- | --- | --- | --- | --- | --- | --- | --- | --- | --- | --- |
| **Author, Year** | **Q1*** | **Q2*** | **Q3*** | **Q4*** | **Q5*** | **Q6*** | **Q7*** | **Q8*** | **Q9*** | **Total Score** | **Quality Assessment**** | **Choice - Comments/Justification** |
| Afshari et al., 2022 | Yes | Yes | Yes | Yes | Yes | Yes | Yes | Yes | Yes | 9 | Low |  |
| Naeemi et al., 2022 | Yes | Yes | Yes | Yes | Yes | Yes | Yes | Yes | Yes | 8 | Low |  |
| Saffari et al., 2020 | Yes | No | N/A | N/A | Yes | N/A | Yes | Yes | Yes | 5 | Moderate | No control group |
| Khorsandi et al., 2017 | No | Yes | Yes | Yes | Yes | Yes | Yes | Yes | Yes | 8 | Low | Control group received educational pamphlet |
| Allah and Khalil, 2016 | Yes | Yes | Yes | Yes | Yes | Yes | No | Yes | Yes | 8 | Low | Reliability of the scales used was not shown |

*****

Q1. Is it clear in the study what is the “cause” and what is the “effect” (i.e. there is no confusion about which variable comes first)?

Q2. Was there a control group?

Q3. Were participants included in any comparisons similar?

Q4. Were the participants included in any comparisons receiving similar treatment/care, other than the exposure or intervention of interest?

Q5. Were there multiple measurements of the outcome, both pre and post the intervention/exposure?

Q6. Were the outcomes of participants included in any comparisons measured in the same way?

Q7. Were outcomes measured in a reliable way?

Q8. Was follow-up complete and if not, were differences between groups in terms of their follow-up adequately described and analyzed?

Q9. Was appropriate statistical analysis used?

****A JBI score <4 indicated a high risk of bias, 4-6 to moderate, and ≥7 to low risk of bias** 1

**References:**

1. Manosroi W, Phudphong P, Atthakomol P, Phimphilai M. The differences of serum lipid profiles between primary aldosteronism and essential hypertension: a meta-analysis and systematic review. BMC Endocr Disord. 2022 Aug 31;22(1):217.
